# Supplementary material
Source: HighWire-hosted journal article supplement (https://jpet.aspetjournals.org/content/suppl/2005/07/13/jpet.105.090472)

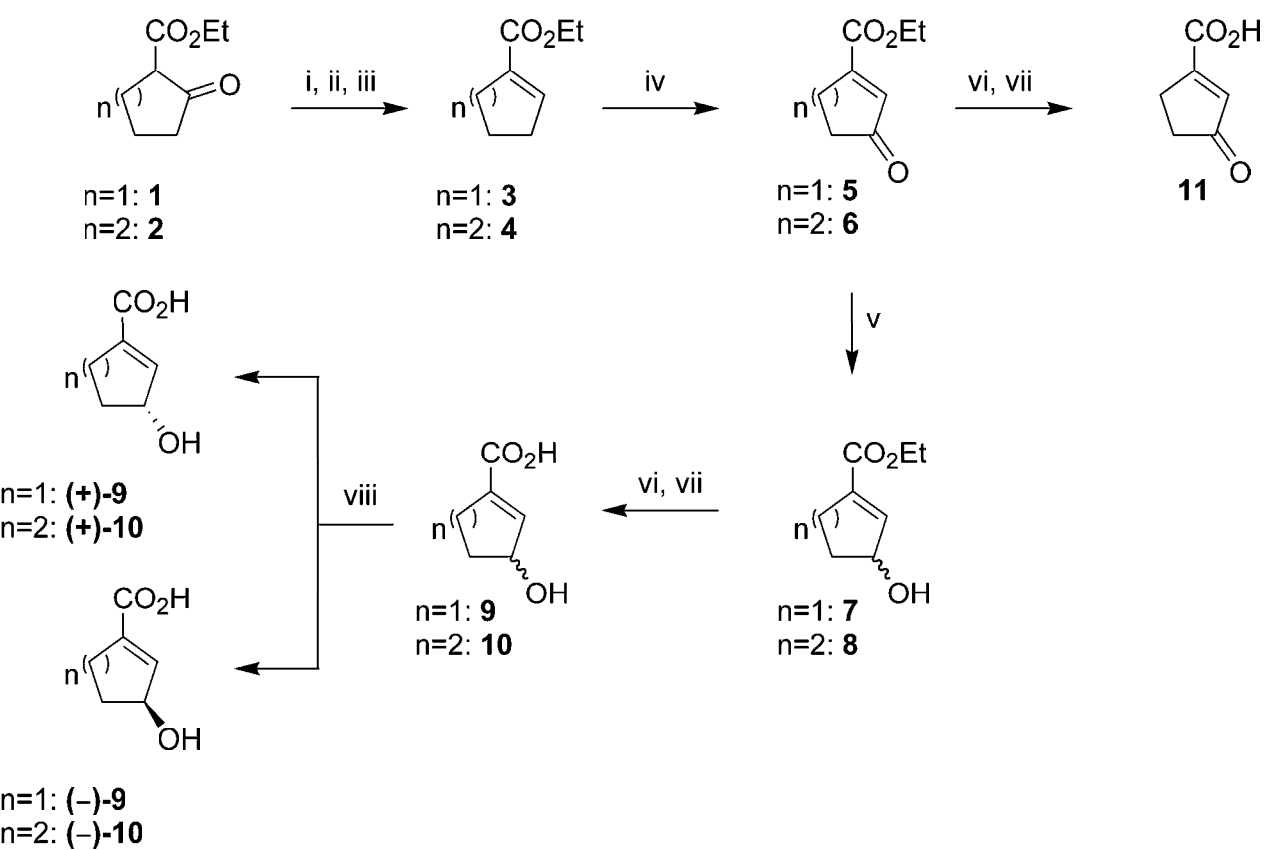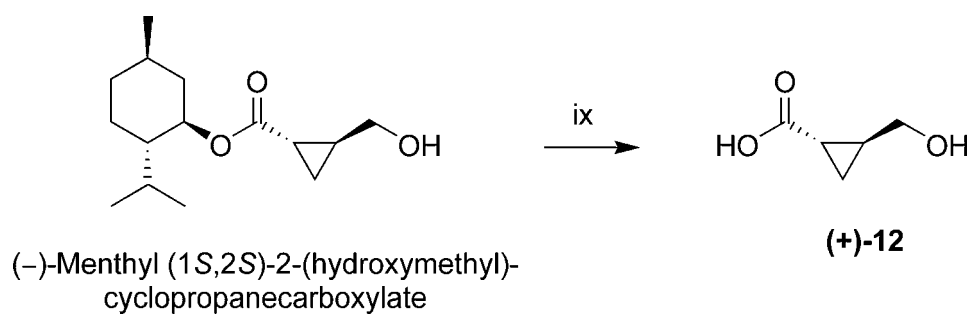

**Scheme1\_supp\_data**

Supplement: Scheme_1.pdf [file Scheme_1.pdf]
